# Supplementary material for: Vincamine Modulates the Effect of Pantoprazole in Renal Ischemia/Reperfusion Injury by Attenuating MAPK and Apoptosis Signaling Pathways
Source: MDPI journal article supplement (doi:10.3390/molecules27041383), 2022-02-18
Supplement: s1 [file s1]

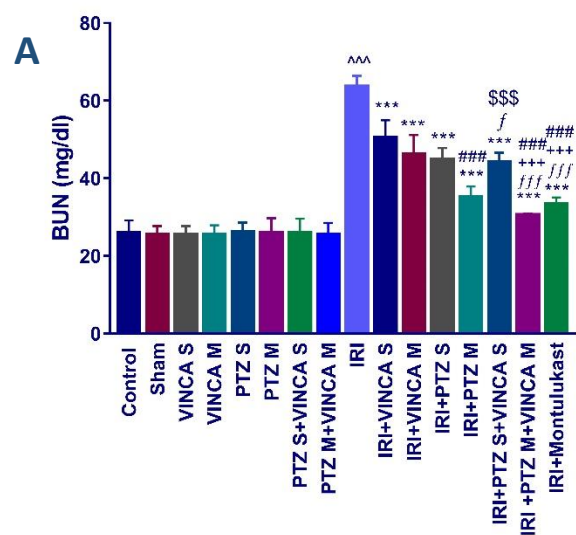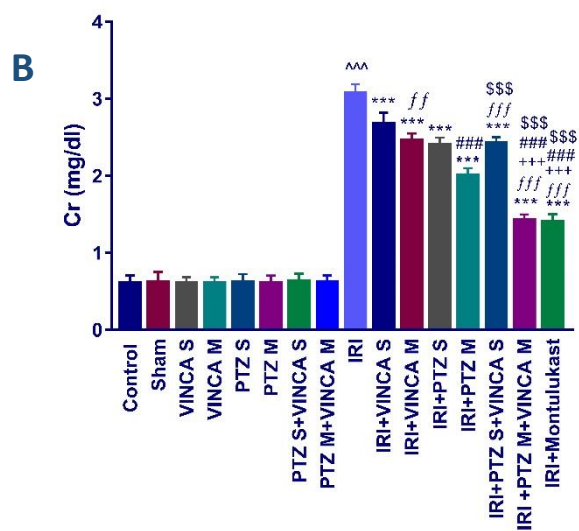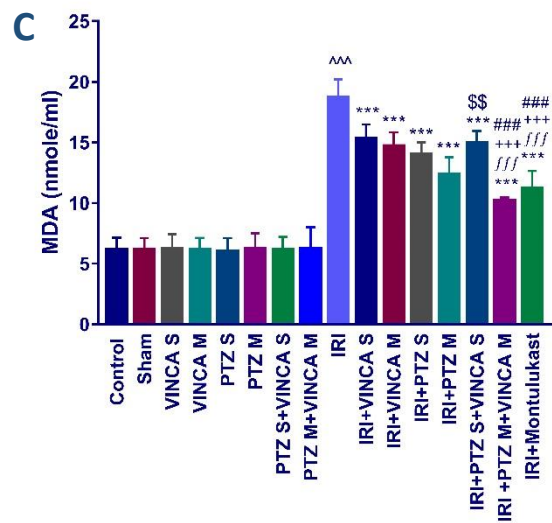

**Figure S1.** Effects of the different therapies on serum BUN (A), Scr (B), and MDA (C) levels. Bars represent mean  $\pm$  SD. After the one-way ANOVA test, the Bonferroni post-hoc test was used to determine the significant differences between the groups, where:  $^{^^}$ :  $P < 0.001$ , compared to the control rats.  $^{***}$ :  $P < 0.001$ , compared to the IRI group.  $^{###}$ :  $P < 0.001$ , compared to the IRI + PTZ S group.  $^{+++}$ :  $P < 0.001$ , compared to the IRI + VINCA M group.  $^f$ :  $P < 0.05$ ,  $^{ff}$ :  $P < 0.01$ , and  $^{fff}$ :  $P < 0.001$ , compared to the IRI + VINCA S group.  $^{\$}$ :  $P < 0.05$ ,  $^{\$\$}$ :  $P < 0.01$ ,  $^{\$ \$ \$}$ :  $P < 0.001$  compared to the IRI + PTZ M group.

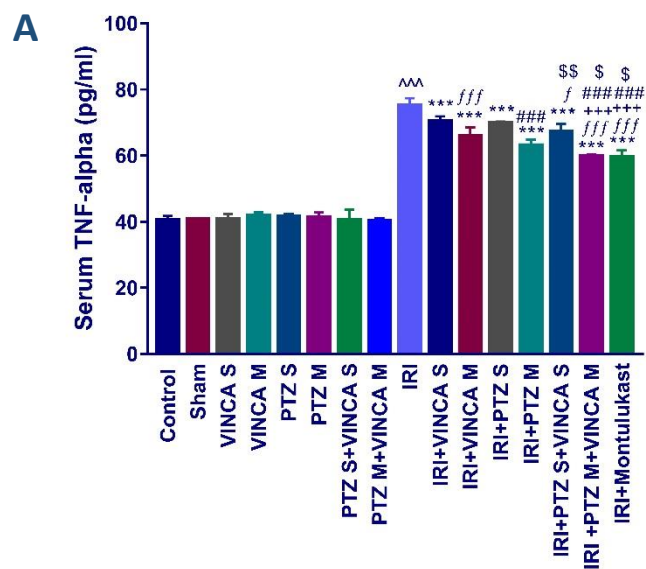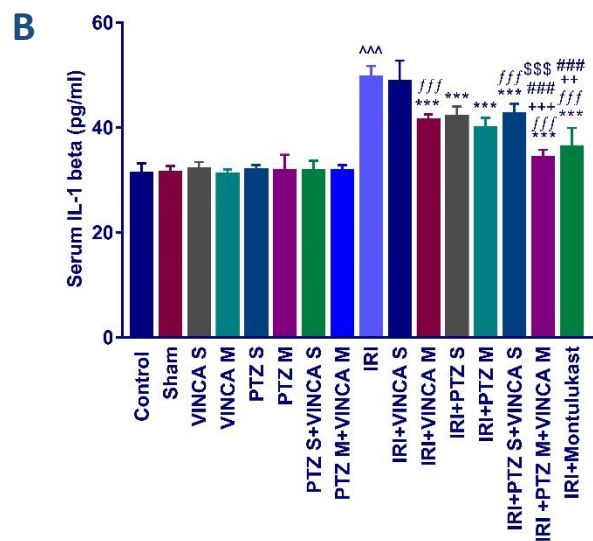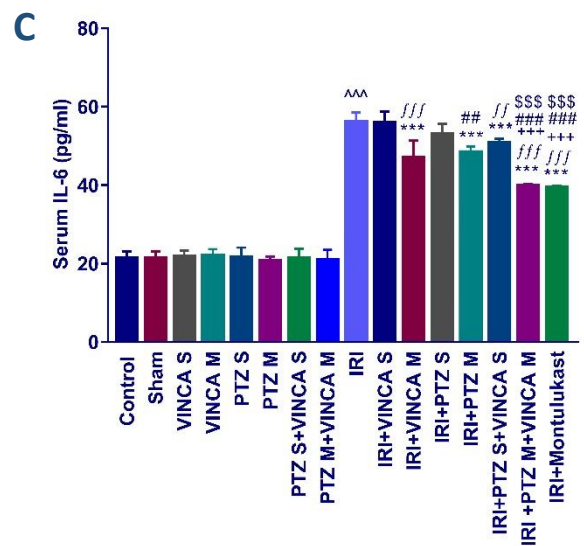

**Figure S2.** Impact on the inflammatory cytokines levels. Serum levels of (A) TNF- $\alpha$ , (B) IL-1 $\beta$ , and (C) IL-6 (pg/ml) for the studied groups. Bars represent mean  $\pm$  SD. After the one-way ANOVA test, the Bonferroni post-hoc test was used to determine the significant differences between the groups, where:  $^{^^}$ :  $P < 0.001$ , compared to the control rats.  $^{**}$ :  $P < 0.001$ , compared to the IRI rodents.  $^{##}$ :  $P < 0.01$ ,  $^{###}$ :  $P < 0.001$ , compared to the IRI + PTZ S group.  $^{\$}$ :  $P < 0.05$ ,  $^{\$\$}$ :  $P < 0.01$ ,  $^{$$$}$ :  $P < 0.001$ , compared to the IRI + PTZ M group.  $^f$ :  $P < 0.05$ ,  $^{ff}$ :  $P < 0.01$ , and  $^{fff}$ :  $P < 0.001$ , compared to the IRI + VINCA S group.  $^{+++}$ :  $P < 0.001$ , compared to the IRI + VINCA M group.

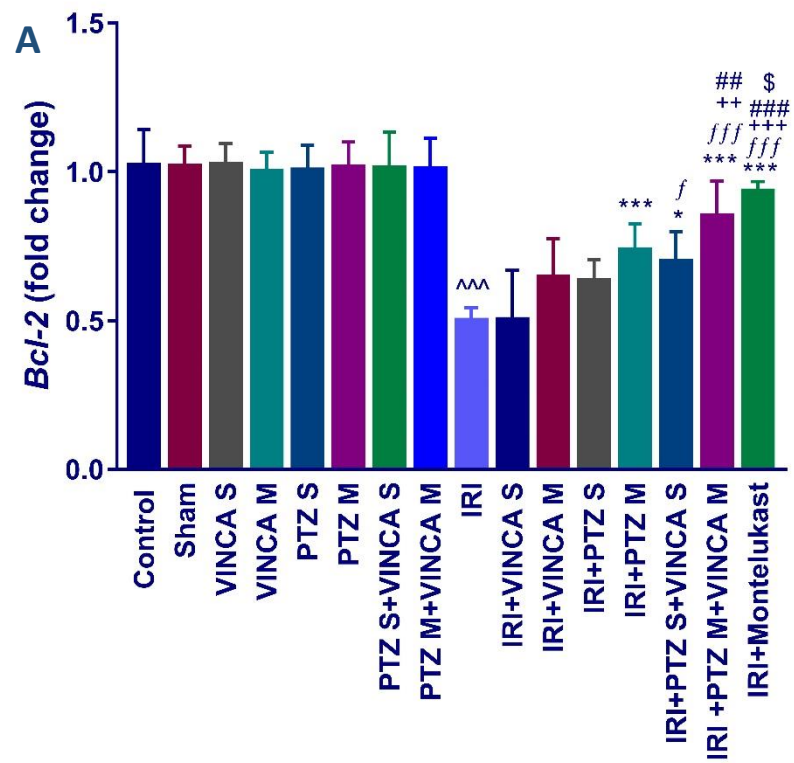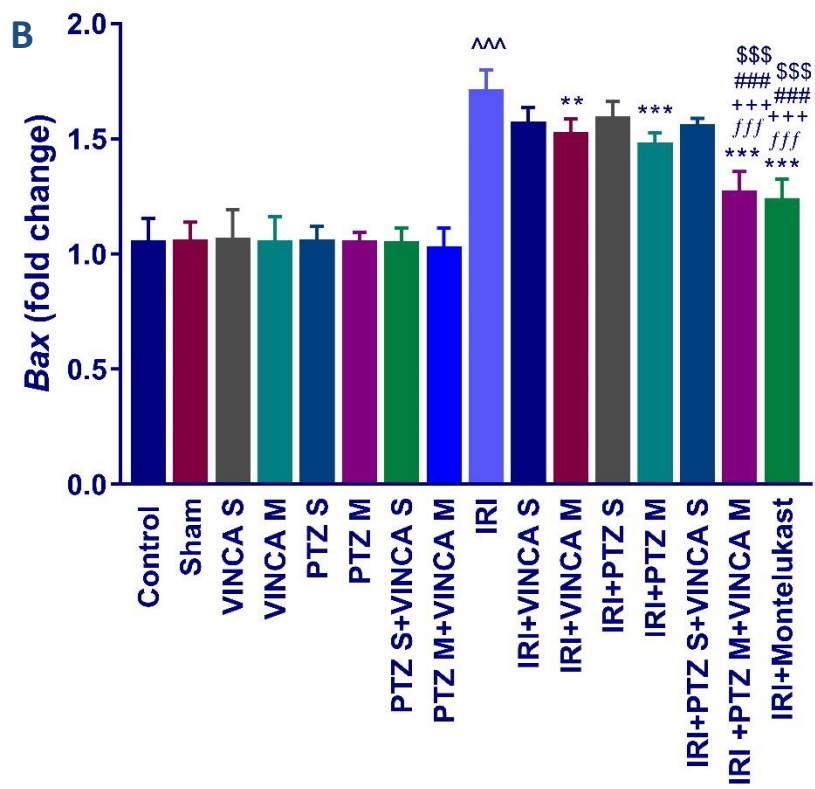

**Figure S3.** *Bcl-2* (A) and *Bax* (B) molecular expressions in the kidneys of the studied groups using RT-PCR. Data were presented as fold changes relative to the control group. Bars represent mean  $\pm$  SD. After the one-way ANOVA test, the Bonferroni post-hoc test was used to determine the significant differences between the groups, where:  $^{^^}$ :  $P < 0.001$ , compared to the control animals. \*:  $P < 0.05$ , \*\*:  $P < 0.01$ , and \*\*\*:  $P < 0.001$ , compared to the IRI group. ##:  $P < 0.01$ , and ###:  $P < 0.001$ , compared to the IRI + PTZ S group. \$:  $P < 0.05$ , compared to the IRI + PTZ M group. ++:  $P < 0.01$ , and +++:  $P < 0.001$ , compared to the IRI + VINCA M group. f:  $P < 0.05$ , and fff:  $P < 0.001$  compared to the IRI + VINCA S group.

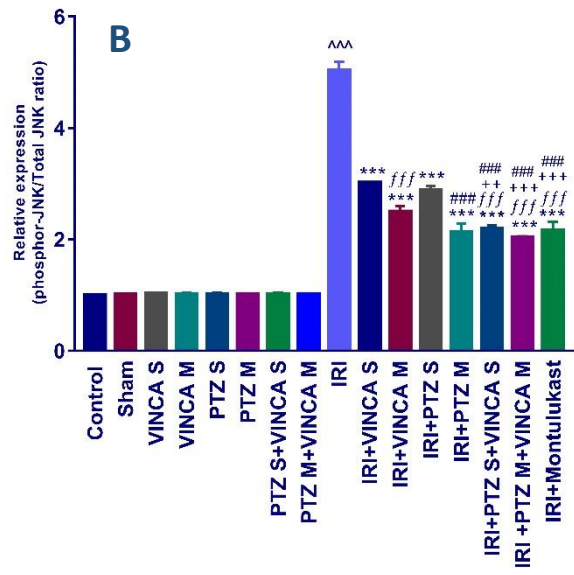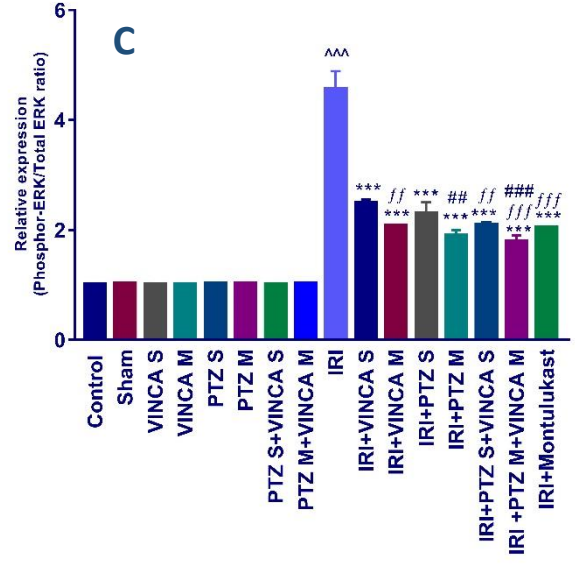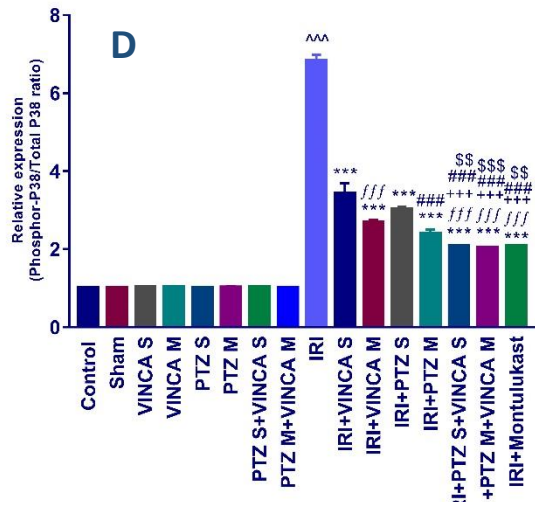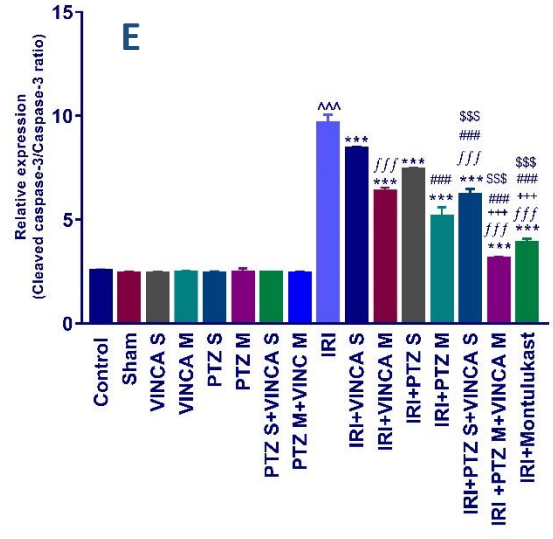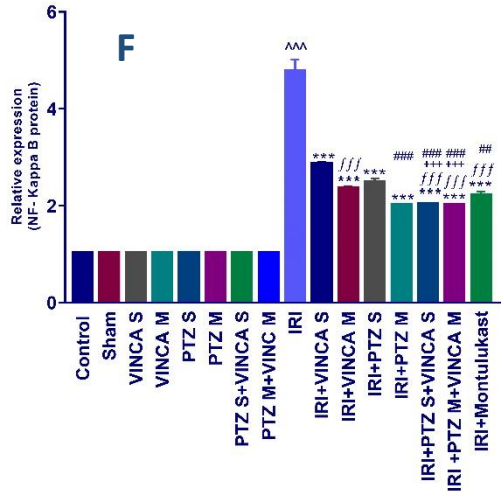

**Figure S4.** Effects on JNK1/2, ERK1/2, p38, caspase-3 and NF-kB proteins expression. (B, C, D, E, F) Expressions of phosphor-JNK1/2/total JNK1/2, phosphor-ERK1/2/total ERK1/2, phosphor-P38/total P38, cleaved caspase3/caspase-3 and total NF-kB proteins, respectively. Bars represent mean  $\pm$  SD. After the one-way ANOVA test, the Bonferroni post-hoc test was used to determine the statistical significance between the studied groups, where:  $^{^^}$ :  $P < 0.001$ , compared to the control animals.  $^{***}$ :  $P < 0.001$ , compared to the injured animals.  $^{##}$ :  $P < 0.01$ , and  $^{###}$ :  $P < 0.001$ , compared to the IRI + PTZ S group.  $^{\$}$ :  $P < 0.05$ ,  $^{\$\$}$ :  $P < 0.01$ , and  $^{\$ \$ \$}$ :  $P < 0.001$ , compared to the IRI + PTZ M group.  $^f$ :  $P < 0.05$ , and  $^{fff}$ :  $P < 0.001$  compared to the IRI + VINCA S group.  $^{+}$ :  $P < 0.05$ ,  $^{++}$ :  $P < 0.01$ , and  $^{+++}$ :  $P < 0.001$ , compared to the IRI + VINCA M group.



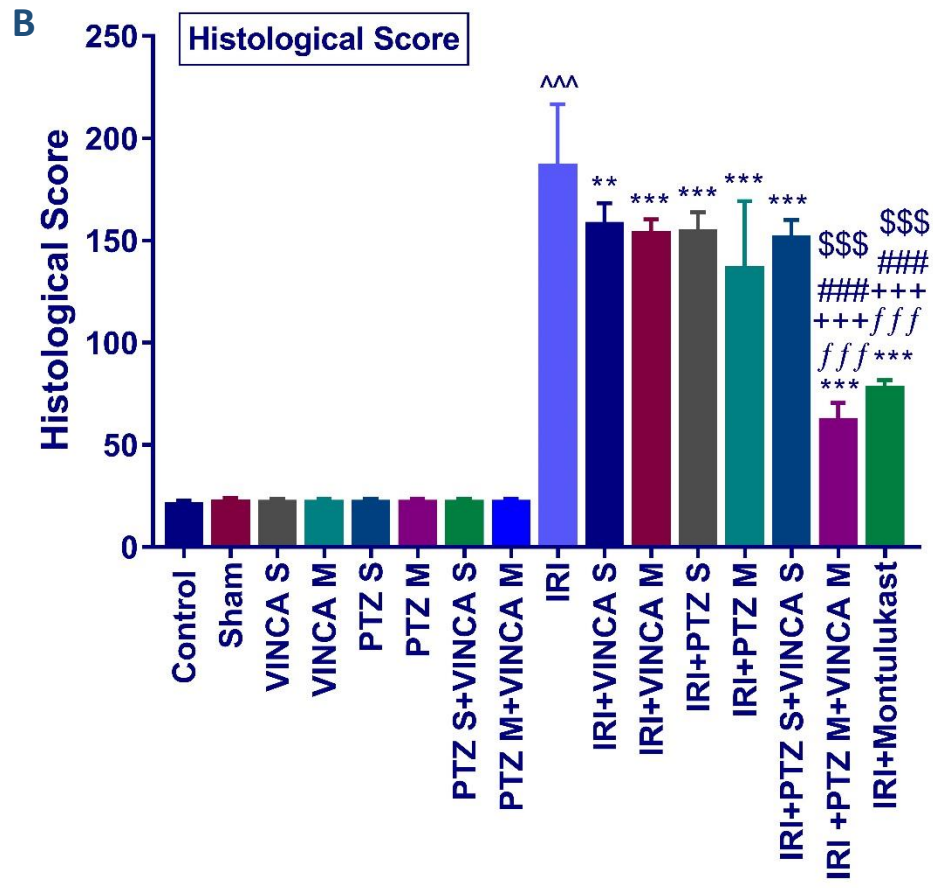

**Figure S5 (B).** Histological score regarding the damage of the studied groups: Control, Sham, VINCA S, VINCA M, PTZ S, PTZ M, VINCA S + PTZ S, VINCA M + PTZ M, IRI, (IRI + VINCA S), (IRI + VINCA M), (IRI + PTZ S), (IRI + PTZ M), (IRI + VINCA S + PTZ S), (IRI+VINCA M + PTZ M), (IRI + Montelukast) (IRI + Mont.) groups. Bars represent mean  $\pm$  SD. After the one-way ANOVA test, the Bonferroni post-hoc test was used to determine the statistical significance between the studied groups, where:  $^{^^}$ :  $P < 0.001$ , compared to the control animals. \*:  $P < 0.05$ , \*\*:  $P < 0.01$ , and \*\*\*:  $P < 0.001$ , compared to the injured animals. ###:  $P < 0.001$ , compared to the IRI + PTZ S group. \$\$\$:  $P < 0.001$ , compared to the IRI + PTZ M group. fff:  $P < 0.001$  compared to the IRI + VINCA S group. +++:  $P < 0.001$ , compared to the IRI + VINCA M group.
